# Supplementary material
Source: publisher figshare collection journal article supplement (https://gsajournals.figshare.com/ndownloader/files/18609023)
Supplement: Supplementary file 1 [file 18609023]

TABLE S1. BROOD SIZE AND EMBRYONIC LETHALITY IN ANIMALS TREATED WITH K-NAA, IAA AND THEIR CONTROLS.

| STRAIN | TREATMENT  (25°C) | BROOD SIZE (±SD) | % EMBRYONIC LETHALITY (±SD) |
| --- | --- | --- | --- |
| *eft-3>TIR1::mRuby;*  *nhr-23::AID* | 0% EtOH | 220.0 (32.9) | 2.0 (1.3) |
| *eft-3>TIR1::mRuby;*  *nhr-23::AID* | 4 mM K-NAA | 219.5 (40.1) | 1.88 (0.68) |
| *eft-3>TIR1::mRuby;*  *nhr-23::AID* | 0.25% EtOH | 208.3 (41.1) | 2.6 (1.3) |
| *eft-3>TIR1::mRuby;*  *nhr-23::AID* | 4 mM IAA | 222.3 (29.8) | 3.1 (1.1) |
